# Supplementary material
Source: MDPI journal article supplement (https://www.mdpi.com/1424-2818/14/6/468)
Supplement: s1 [file s1]

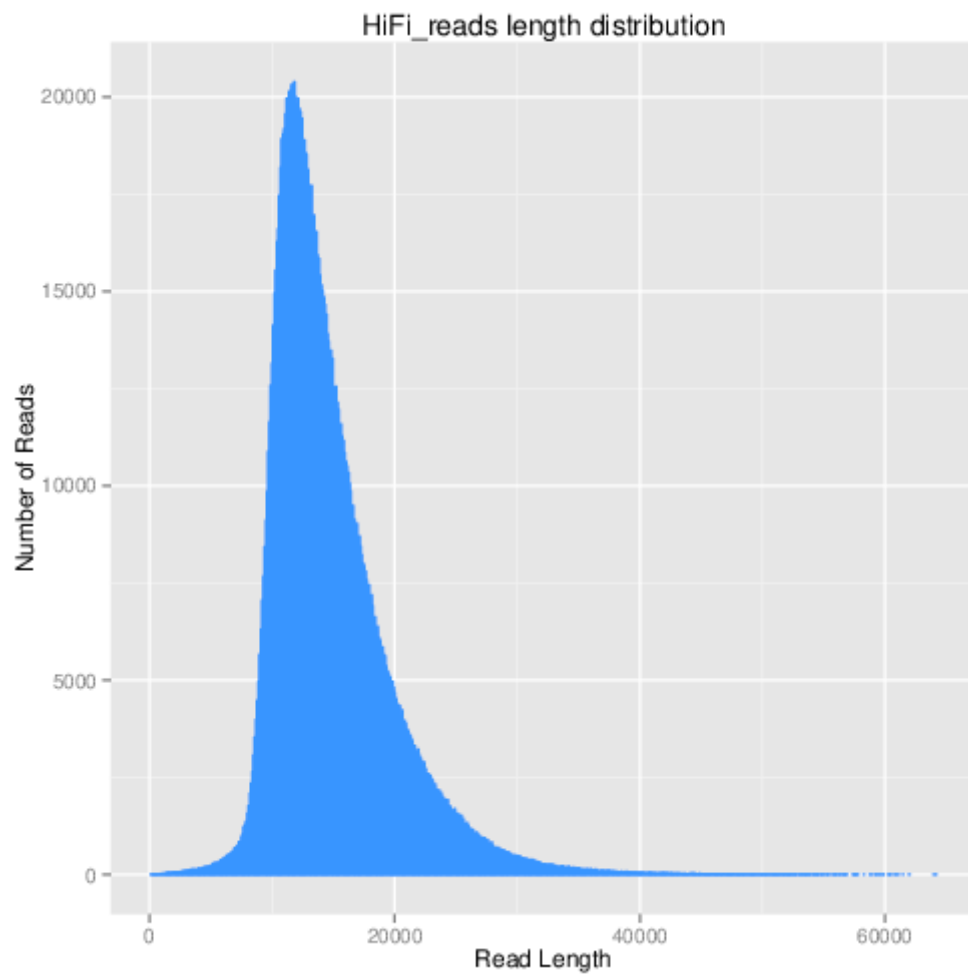

**Figure S1. The distribution frequency of PacBio's HiFi sequencing data.** Abscissa axis represents the length of reads (bp), and vertical axis shows the number of reads.

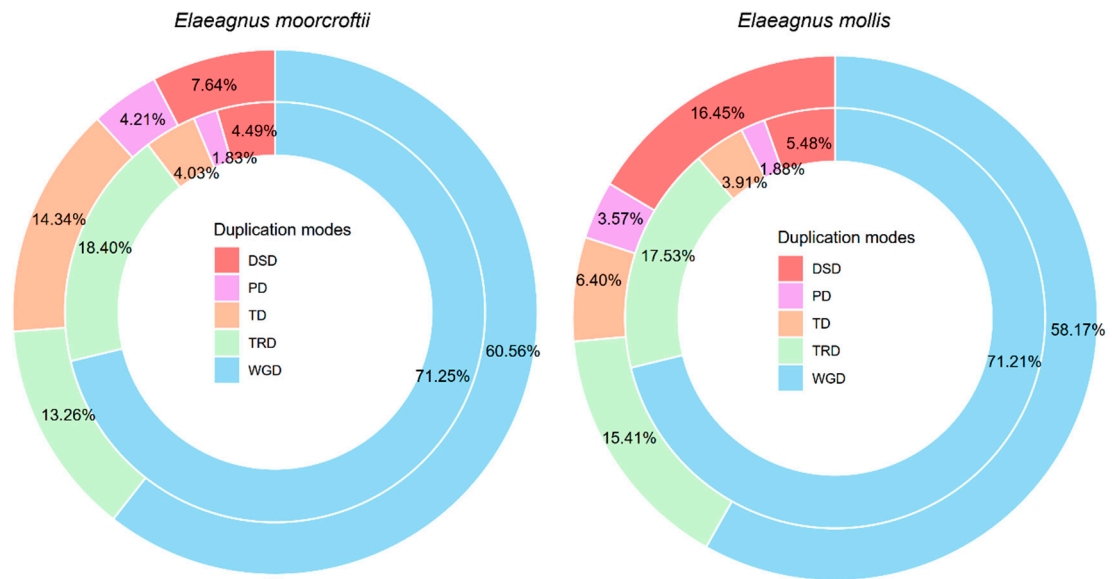

**Figure S2. The different modes of gene duplications related to expanded and contracted gene families in *E. moorcroftii* and *E. mollis*.** DSD: dispersed duplications; PD: proximal duplications; TD: tandem duplications; TRD: transposed duplications; WGD: whole genome duplications. The outer and inner circles indicate the expanded and contracted gene families in each species, respectively.

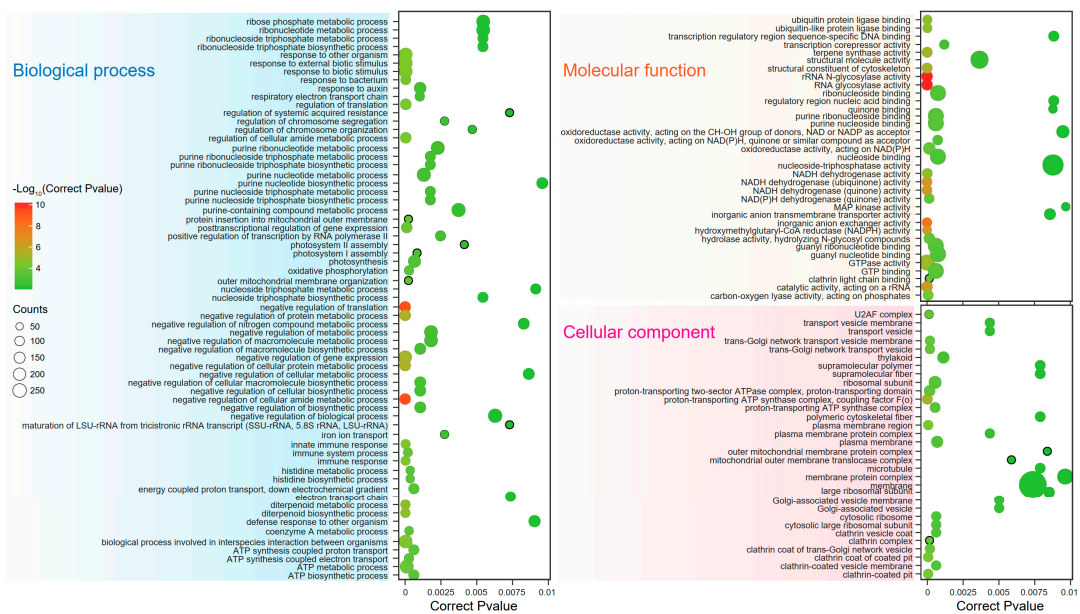

**Figure S3. The enriched GO terms for the expanded gene families of *E. moorcroftii*.**

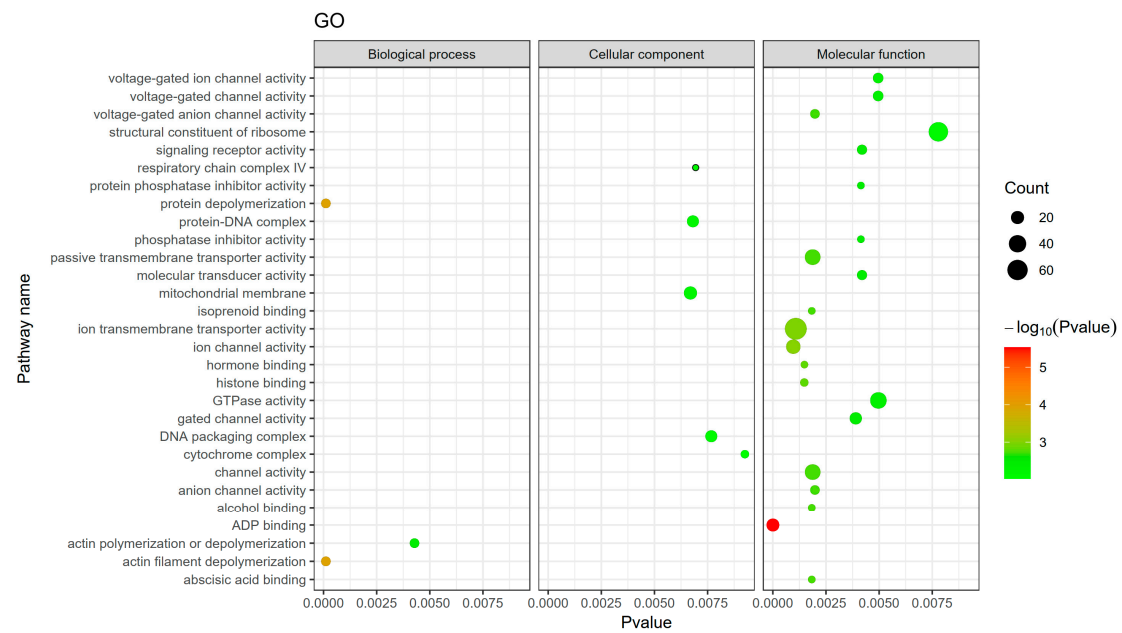

Figure S4. The enriched GO terms for the contracted gene families of *E. moorcroftii*.

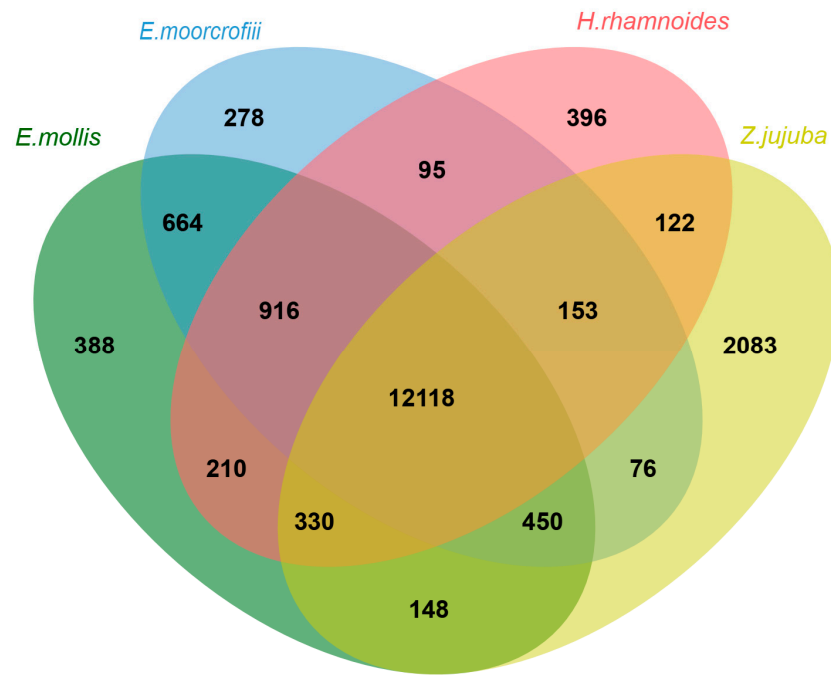

Figure S5. Venn diagram showing the shared and specific gene families among *E. moorcroftii*, *E. mollis*, *H. rhamnoides*, and *Z. jujuba*.

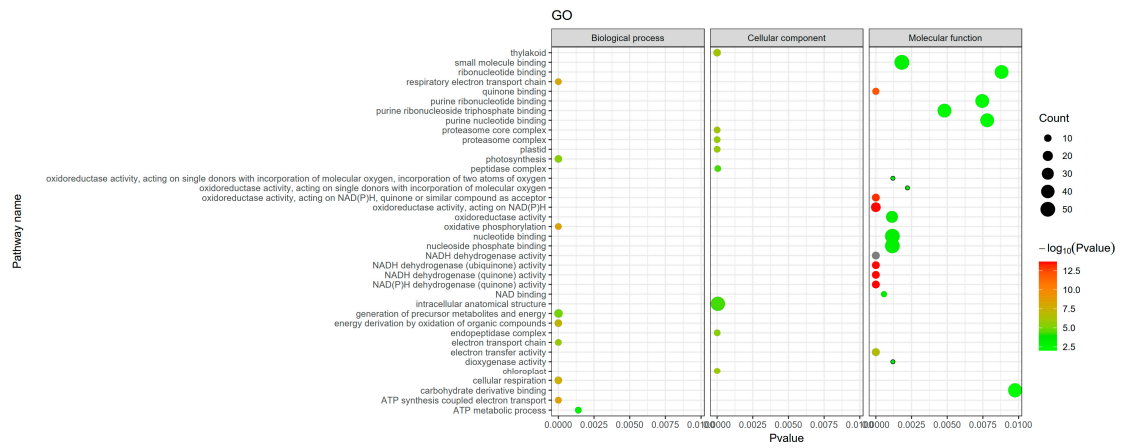

Figure S6. The enriched GO terms for the unique gene families of *E. moorcroftii*.

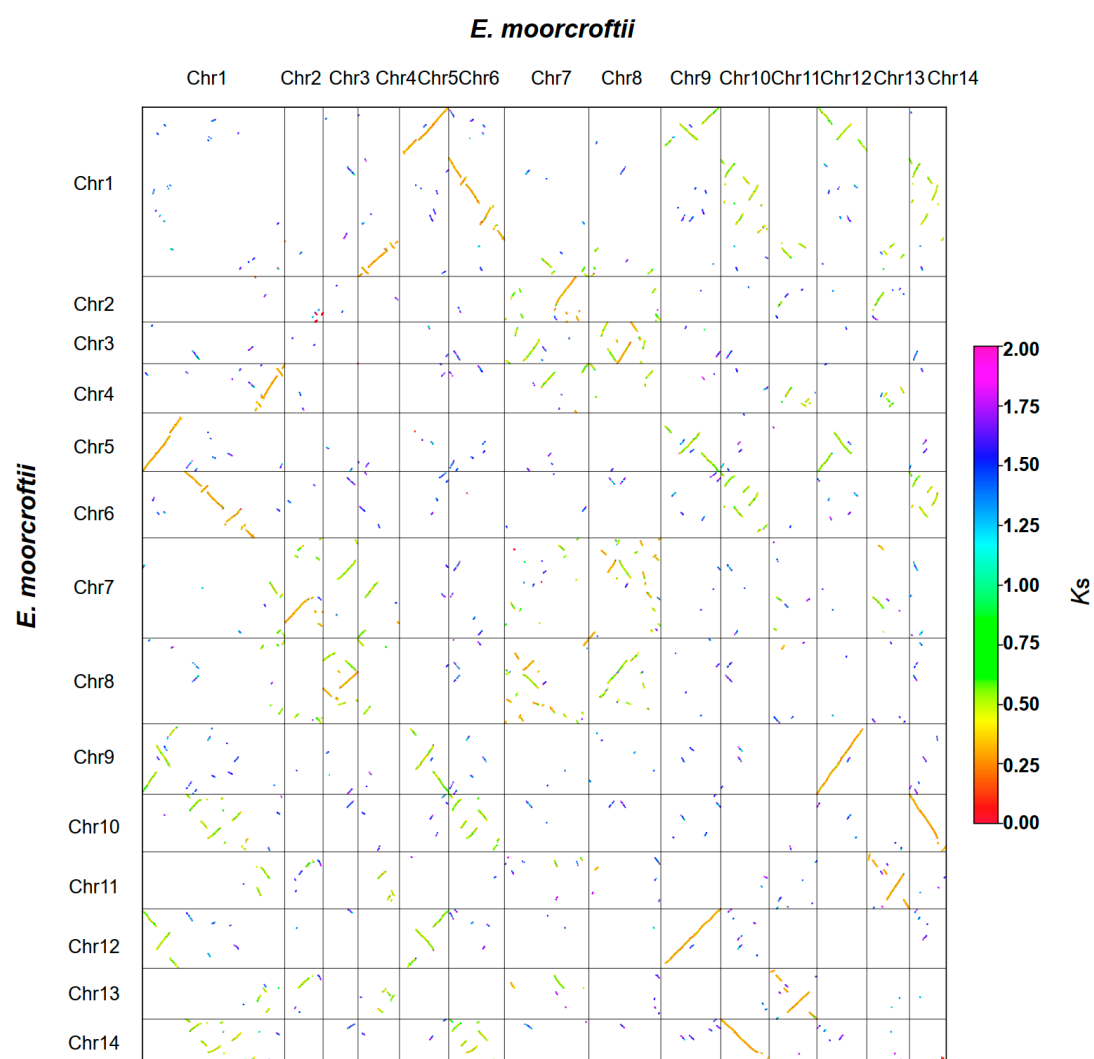

**Figure S7. Syntenic dot plot of the self-comparison of *E. moorcroftii*.**

**Table S1. Information of plant genomes used in this study.**

| Family       | Species name                 | Version      | Gene number | Data source      |
|--------------|------------------------------|--------------|-------------|------------------|
| Brassicaceae | <i>Arabidopsis thaliana</i>  | TAIR v10     | 27,380      | Phytozome v9     |
| Salicaceae   | <i>Populus trichocarpa</i>   | Version 4.1  | 34,699      | Phytozome v13    |
| Vitaceae     | <i>Vitis vinifera</i>        | Version 2.1  | 31,730      | Phytozome v13    |
| Cannabaceae  | <i>Cannabis sativa</i>       | Version 1.21 | 33,556      | NCBI             |
| Rosaceae     | <i>Malus domestica</i>       | Version 1.1  | 45,105      | Phytozome v12    |
|              | <i>Prunus persica</i>        | Version 2.1  | 26,873      | Phytozome v10    |
| Elaeagnaceae | <i>Elaeagnus mollis</i>      | Version 1.0  | 33,446      | Ren et al., 2021 |
|              | <i>Elaeagnus moorcroftii</i> | Version 1.0  | 29,243      | This study       |
|              | <i>Hippophae rhamnoides</i>  | Version 1.0  | 30,812      | Wu et al., 2022  |
| Moraceae     | <i>Morus notabilis</i>       | Version 1.21 | 27,100      | NCBI             |
| Rhamnaceae   | <i>Ziziphus jujuba</i>       | Version 1.21 | 43,012      | NCBI             |

**Table S2. Basic statistics of PacBio's HiFi sequencing data.**

| Read number | Max read length (bp) | Mean read length (bp) | N50 of read(bp) |
|-------------|----------------------|-----------------------|-----------------|
| 1,630,175   | 64,203               | 14,783                | 15,012          |

**Table S3. Mapping rates of RNA-seq reads onto the assembly genome.**

| Accession number | Mapping rate (%) |
|------------------|------------------|
| SRR12569922      | 93.14            |
| SRR12569923      | 94.12            |
| SRR12569923      | 94.27            |

**Table S4. Genome assembly completeness evaluated based on BUSCO.**

| Type (gene)                         | Number | Percent (%) |
|-------------------------------------|--------|-------------|
| Complete BUSCOs (C)                 | 1,546  | 95.80       |
| Complete and single-copy BUSCOs (S) | 1,365  | 84.60       |
| Complete and duplicated BUSCOs (D)  | 181    | 11.20       |
| Fragmented BUSCOs (F)               | 15     | 0.90        |
| Missing BUSCOs (M)                  | 53     | 3.3         |
| Total BUSCO groups searched         | 1,614  | 100         |

**Table S5. Information of different classes of repetitive sequences in *E. moorcroftii* genome.**

| Order          | Super family   | Length of<br>sequence (bp) | Percent of<br>sequence (%) |
|----------------|----------------|----------------------------|----------------------------|
| DNA            |                | 18,960,827                 | 95.80                      |
|                | DNA_CMC-EnSpm  | 3,115,353                  | 0.588                      |
|                | DNA_MuDR       | 6,932,482                  | 1.309                      |
|                | DNA_PIF-       |                            |                            |
|                | Harbinger      | 1,158,088                  | 0.219                      |
|                | DNA_hAT-Ac     | 5,112,542                  | 0.965                      |
|                | DNA_hAT-Tip100 | 901,009                    | 0.17                       |
|                | DNA_other      | 1,933,355                  | 0.365                      |
|                |                |                            |                            |
| LINE           |                | 8,004,781                  | 1.512                      |
|                | LINE_L1        | 7,588,087                  | 1.433                      |
|                | LINE_L2        | 243                        | 0                          |
|                | LINE_other     | 419,200                    | 0.079                      |
| LTR            |                | 169,178,687                | 31.947                     |
|                | LTR_Copia      | 84,853,051                 | 16.023                     |
|                | LTR_Gypsy      | 70,425,005                 | 13.299                     |
|                | LTR_other      | 14,562,811                 | 2.75                       |
| Low_complexity |                | 1,583,252                  | 0.299                      |
| SINE           |                | 43,867                     | 0.008                      |
| Satellite      |                | 3,123,906                  | 0.59                       |

|                                    |             |        |
|------------------------------------|-------------|--------|
| Simple_repeat                      | 38,925,148  | 7.35   |
| Small_RNA                          | 5,324,239   | 1.005  |
| Unclassified_ARTEFACT              | 203         | 0      |
| Unclassified_RC                    | 6,076       | 0.001  |
| Unclassified_RC/Helitron           | 1,799,103   | 0.34   |
| Unclassified_Retroposon            | 148,909     | 0.028  |
| Unclassified_Retroposon/<br>L1-dep | 44          | 0      |
| Unclassified_Unknown               | 115,622,651 | 21.834 |
| Total Repeats                      | 322,779,888 | 60.95  |

**Table S6. Functional annotation of the predicted genes in *E. moorcroftii*.**

|             | Database     | Gene number | Percent (%) |
|-------------|--------------|-------------|-------------|
| Total       |              | 29,243      | 100         |
|             | InterProScan | 25,178      | 86.10       |
|             | GO           | 18,982      | 64.91       |
|             | KEGG         | 1,131       | 3.87        |
|             | NR           | 27,709      | 94.75       |
|             | SwissProt    | 23,799      | 81.38       |
|             | KOG          | 26,682      | 91.24       |
| Annotated   |              | 27,810      | 95.10       |
| Unannotated |              | 1,433       | 4.90        |

**Table S7. *E. moorcroftii* genome annotation completeness evaluated based on BUSCO.**

| Type (gene)                         | Number | Percent (%) |
|-------------------------------------|--------|-------------|
| Complete BUSCOs (C)                 | 1,572  | 97.40       |
| Complete and single-copy BUSCOs (S) | 1,366  | 84.6        |
| Complete and duplicated BUSCOs (D)  | 206    | 12.8        |
| Fragmented BUSCOs (F)               | 18     | 1.1         |
| Missing BUSCOs (M)                  | 24     | 1.5         |
| Total BUSCO groups searched         | 1,614  | 100         |

**Table S8. List of non-coding RNA genes in *E. moorcroftii* genome.**

| Type  | Number | Average length (bp) |
|-------|--------|---------------------|
| miRNA | 183    | 124.86              |
| snRNA | 2,461  | 107.52              |
| tRNA  | 1,636  | 75.21               |
| rRNA  | 20,568 | 238.47              |
